# Supplementary material for: Vertical transmission of gut bacteria in commercial chickens is limited
Source: Springer Nature journal article supplement (doi:10.1186/s42523-023-00272-6), 2023-10-10
Supplement: MOESM3 [file 42523_2023_272_MOESM3_ESM.pdf]

Supplementary table S1: ANOSIM between different age groups.

| Group 1        | Group 2 | Round 1        |         | Round 2        |         | Round 3        |         |
|----------------|---------|----------------|---------|----------------|---------|----------------|---------|
|                |         | <i>p-value</i> | R value | <i>p-value</i> | R value | <i>p-value</i> | R value |
| Untreated hens | Day 2   | 0.0006         | 0.9373  | 0.0006         | 0.8887  | 0.0006         | 0.8635  |
|                | Day 7   | 0.0006         | 0.9098  | 0.0006         | 0.9037  | 0.0006         | 0.9018  |
|                | Day 14  | 0.0006         | 0.8699  | 0.0006         | 0.8559  | 0.0006         | 0.908   |
| Day 2          | Day 7   | 0.0006         | 0.2617  | 0.0006         | 0.5789  | 0.0006         | 0.3619  |
|                | Day 14  | 0.0006         | 0.7194  | 0.0006         | 0.7848  | 0.0006         | 0.6116  |
| Day 7          | Day 14  | 0.0006         | 0.3734  | 0.0006         | 0.3433  | 0.0006         | 0.2581  |

\* Bonferroni-corrected *p-values* are presented

Supplementary table S2: ANOSIM of chicks between different rounds.

| Group 1 | Group 2 | Day 2          |         | Day 7          |         | Day 14         |         |
|---------|---------|----------------|---------|----------------|---------|----------------|---------|
|         |         | <i>p-value</i> | R value | <i>p-value</i> | R value | <i>p-value</i> | R value |
| Round 1 | Round 2 | 0.0003         | 0.6006  | 0.0003         | 0.3552  | 0.0003         | 0.3964  |
|         | Round 3 | 0.0003         | 0.5236  | 0.0003         | 0.43    | 0.0003         | 0.3812  |
| Round 2 | Round 3 | 0.0003         | 0.292   | 0.0138         | 0.104   | 0.0003         | 0.2751  |

\* Bonferroni-corrected *p-values* are presented

Supplementary table S3: ANOSIM of untreated hen samples in different rounds.

|         |         | Bray-Curtis    |         | Jaccard        |         |
|---------|---------|----------------|---------|----------------|---------|
| Group 1 | Group 2 | <i>p-value</i> | R value | <i>p-value</i> | R value |
| Round 1 | Round 2 | 0.0894         | 0.1053  | 0.2037         | 0.1076  |
|         | Round 3 | 1              | -0.102  | 1              | 0.00147 |
| Round 2 | Round 3 | 0.4485         | 0.1725  | 0.4344         | 0.176   |

\* Bonferroni-corrected *p-values* are presented

Supplementary table S4: ANOSIM between treated and untreated hens.

| Site    | Bray-Curtis    |         | Jaccard        |         |
|---------|----------------|---------|----------------|---------|
|         | <i>p-value</i> | R value | <i>p-value</i> | R value |
| Feces   | 0.0002         | 0.9775  | 0.0002         | 0.7609  |
| Jejunum | 0.0079         | 0.95    | 0.0079         | 0.8781  |
| Cecum   | 0.029          | 1       | 0.03           | 1       |
